# Supplementary material for: Effectiveness of online mindfulness-based interventions in improving mental health during the COVID-19 pandemic: A systematic review and meta-analysis of randomized controlled trials
Source: PubMed Central journal article supplement (PMC9491555; doi:10.1371/journal.pone.0274177), 2022-09-21
Supplement: pone.0274177.s001.pdf [file pone.0274177.s001.pdf]

## SUPPLEMENTARY MATERIALS

### **Effectiveness of online mindfulness-based interventions in improving mental health during the COVID-19 pandemic: A systematic review and meta-analysis of randomized controlled trials**

Bendix Samarta Witarto<sup>1</sup>, Visuddho Visuddho<sup>1</sup>, Andro Pramana Witarto<sup>1</sup>, Damba Bestari<sup>2,3</sup>, Brihastami Sawitri<sup>2,3</sup>, Tando Abner Sivile Melapi<sup>4</sup>, Citrawati Dyah Kencono Wungu<sup>5,6\*</sup>

<sup>1</sup> Medical Program, Faculty of Medicine, Universitas Airlangga, Surabaya, Indonesia

<sup>2</sup> Department of Psychiatry, Faculty of Medicine Universitas Airlangga/Dr. Soetomo Hospital, Surabaya, Indonesia

<sup>3</sup> Department of Psychiatry, Universitas Airlangga Hospital, Surabaya, Indonesia

<sup>4</sup> Department of Psychiatry, University of the Witwatersrand, Johannesburg, South Africa

<sup>5</sup> Department of Physiology and Medical Biochemistry, Faculty of Medicine, Universitas Airlangga, Surabaya, Indonesia

<sup>6</sup> Institute of Tropical Disease, Universitas Airlangga, Surabaya, Indonesia

#### **\* Corresponding author**

Citrawati Dyah Kencono Wungu, Department of Physiology and Medical Biochemistry, Faculty of Medicine, Universitas Airlangga, Jl. Mayjen Prof. Dr. Moestopo 47, Surabaya, East Java 60132, Indonesia. Email: [citrawati.dyah@fk.unair.ac.id](mailto:citrawati.dyah@fk.unair.ac.id)

## TABLE OF CONTENTS

| <b>Supplementary Material</b>                                                                                                 | <b>Page</b> |
|-------------------------------------------------------------------------------------------------------------------------------|-------------|
| <b>Title, Authors, and Affiliations Page</b>                                                                                  | 1           |
| <b>Table of Contents</b>                                                                                                      | 2           |
| <b>S1 Table.</b> Search strategies.                                                                                           | 3           |
| <b>S2 Table.</b> PICOS framework.                                                                                             | 5           |
| <b>S3 Table.</b> Outcomes of included studies.                                                                                | 6           |
| <b>S1 Fig.</b> Bubble plots of meta-regression analyses of online MBIs effect on mental health outcomes at post-intervention. | 7           |
| <b>S2 Fig.</b> Funnel plots of meta-analyses of online MBIs effect on mental health outcomes at post-intervention.            | 8           |
| <b>S3 Fig.</b> Funnel plots of meta-analyses of online MBIs effect on mental health outcomes at follow-up.                    | 9           |
| <b>References</b>                                                                                                             | 10          |

**S1 Table. Search strategies.**

| Database                      | Keywords                                                                                                                                                                                                                                                                                                                                                                                                                                     |
|-------------------------------|----------------------------------------------------------------------------------------------------------------------------------------------------------------------------------------------------------------------------------------------------------------------------------------------------------------------------------------------------------------------------------------------------------------------------------------------|
| <b>PubMed</b>                 | #1 "Mindfulness"[MeSH Terms] OR "mindful*"[All Fields]                                                                                                                                                                                                                                                                                                                                                                                       |
|                               | #2 "Online Systems"[MeSH Terms] OR "online"[All Fields] OR "on-line"[All Fields] OR "ehealth"[All Fields] OR "e-health"[All Fields] OR "virtual*"[All Fields] OR "web"[All Fields] OR "webs"[All Fields] OR "website*"[All Fields] OR "Internet"[MeSH Terms] OR "internet*"[All Fields] OR "app"[All Fields] OR "apps"[All Fields] OR "application*"[All Fields] OR "mobile*"[All Fields] OR "mhealth"[All Fields] OR "m-health"[All Fields] |
|                               | #3 "COVID-19"[MeSH Terms] OR "COVID 19"[All Fields] OR "SARS-COV-2"[MeSH Terms] OR "SARS-COV-2"[All Fields] OR "SARSCoV2"[All Fields] OR "2019-nCoV"[All Fields] OR "2019nCoV"[All Fields] OR "nCoV-2019"[All Fields] OR "nCoV2019"[All Fields] OR "coronavirus disease 2019"[All Fields] OR "novel coronavirus"[All Fields] OR "new coronavirus"[All Fields]                                                                                |
|                               | #4 controlled clinical trial[MeSH Terms] OR randomized controlled trial[MeSH Terms] OR "random allocation"[MeSH Terms] OR "RCT"[All Fields] OR "random*"[All Fields] OR "control*"[All Fields] OR "trial*"[All Fields]                                                                                                                                                                                                                       |
|                               | #5 #1 AND #2 AND #3 AND #4                                                                                                                                                                                                                                                                                                                                                                                                                   |
| <b>Scopus</b>                 | #1 TITLE-ABS-KEY("mindful*")                                                                                                                                                                                                                                                                                                                                                                                                                 |
|                               | #2 TITLE-ABS-KEY("online" OR "on-line" OR "ehealth" OR "e-health" OR "virtual*" OR "web*" OR "internet*" OR "app*" OR "mobile*" OR "mhealth" OR "m-health")                                                                                                                                                                                                                                                                                  |
|                               | #3 TITLE-ABS-KEY("COVID-19" OR "COVID19" OR "SARS-CoV-2" OR "SARSCoV2" OR "SARS-Cov-19" OR "SARSCoV19" OR "2019-nCoV" OR "2019nCoV" OR "nCoV-2019" OR "nCoV2019" OR "coronavirus disease 2019" OR "novel coronavirus" OR "new coronavirus")                                                                                                                                                                                                  |
|                               | #4 TITLE-ABS-KEY("RCT" OR "random*" OR "control*" OR "trial*")                                                                                                                                                                                                                                                                                                                                                                               |
|                               | #5 #1 AND #2 AND #3 AND #4                                                                                                                                                                                                                                                                                                                                                                                                                   |
| <b>Web of Science</b>         | #1 ALL=("mindful*")                                                                                                                                                                                                                                                                                                                                                                                                                          |
|                               | #2 ALL=("online" OR "on-line" OR "ehealth" OR "e-health" OR "virtual*" OR "web*" OR "internet*" OR "app*" OR "mobile*" OR "mhealth" OR "m-health")                                                                                                                                                                                                                                                                                           |
|                               | #3 ALL=("COVID-19" OR "COVID19" OR "SARS-CoV-2" OR "SARSCoV2" OR "SARS-Cov-19" OR "SARSCoV19" OR "2019-nCoV" OR "2019nCoV" OR "nCoV-2019" OR "nCoV2019" OR "coronavirus disease 2019" OR "novel coronavirus" OR "new coronavirus")                                                                                                                                                                                                           |
|                               | #4 ALL=("RCT" OR "random*" OR "control*" OR "trial*")                                                                                                                                                                                                                                                                                                                                                                                        |
|                               | #5 #1 AND #2 AND #3 AND #4                                                                                                                                                                                                                                                                                                                                                                                                                   |
| <b>ProQuest</b>               | #1 mesh.Exact("mindfulness")                                                                                                                                                                                                                                                                                                                                                                                                                 |
|                               | #2 noft("mindful*")                                                                                                                                                                                                                                                                                                                                                                                                                          |
|                               | #3 mesh.Exact("online systems" OR "internet")                                                                                                                                                                                                                                                                                                                                                                                                |
|                               | #4 noft("online" OR "on-line" OR "ehealth" OR "e-health" OR "virtual*" OR "web*" OR "internet*" OR "app*" OR "mobile*" OR "mhealth" OR "m-health")                                                                                                                                                                                                                                                                                           |
|                               | #5 noft("COVID-19" OR "COVID19" OR "SARS-CoV-2" OR "SARSCoV2" OR "SARS-Cov-19" OR "SARSCoV19" OR "2019-nCoV" OR "2019nCoV" OR "nCoV-2019" OR "nCoV2019" OR "coronavirus disease 2019" OR "novel coronavirus" OR "new coronavirus")                                                                                                                                                                                                           |
|                               | #6 mesh.Exact("Controlled Clinical Trial as Topic" OR "Randomized Controlled Trial as Topic" OR "Random Allocation")                                                                                                                                                                                                                                                                                                                         |
|                               | #7 noft("RCT" OR "random*" OR "control*" OR "trial*")                                                                                                                                                                                                                                                                                                                                                                                        |
|                               | #8 (#1 OR #2) AND (#3 OR #4) AND #5 AND (#6 OR #7)                                                                                                                                                                                                                                                                                                                                                                                           |
| <b>CINAHL (via EBSCOhost)</b> | #1 (MM "Mindfulness") OR "mindful*"                                                                                                                                                                                                                                                                                                                                                                                                          |
|                               | #2 (MH "Online Systems+") OR (MH "Internet+") OR (MM "Internet-Based Intervention") OR "online" OR "on-line" OR "ehealth" OR "e-health" OR "virtual*" OR "web" OR "webs" OR "website*" OR "internet*" OR "app" OR "apps" OR "application*" OR "mobile*" OR "mhealth" OR "m-health"                                                                                                                                                           |
|                               | #3 (MM "COVID-19") OR (MM "SARS-CoV-2") OR "COVID-19" OR "COVID19" OR "SARS-CoV-2" OR "SARSCoV2" OR "SARS-Cov-19" OR "SARSCoV19" OR "2019-nCoV" OR "2019nCoV" OR "nCoV-2019" OR "nCoV2019" OR "coronavirus disease 2019" OR "novel coronavirus" OR "new coronavirus"                                                                                                                                                                         |
|                               | #4 (MH "Clinical Trials+") OR (MH "Randomized Controlled Trials+") OR "RCT" OR "random*" OR "control*" OR "trial*"                                                                                                                                                                                                                                                                                                                           |
|                               | #5 #1 AND #2 AND #3 AND #4                                                                                                                                                                                                                                                                                                                                                                                                                   |
| <b>CENTRAL</b>                | #1 MeSH descriptor: [Mindfulness] explode all trees                                                                                                                                                                                                                                                                                                                                                                                          |
|                               | #2 "mindful*"                                                                                                                                                                                                                                                                                                                                                                                                                                |
|                               | #3 MeSH descriptor: [Online Systems] explode all trees                                                                                                                                                                                                                                                                                                                                                                                       |
|                               | #4 MeSH descriptor: [Internet] explode all trees                                                                                                                                                                                                                                                                                                                                                                                             |
|                               | #5 "online" OR "on-line" OR "ehealth" OR "e-health" OR "virtual*" OR "web*" OR "internet*" OR "app*" OR "mobile*" OR "mhealth" OR "m-health"                                                                                                                                                                                                                                                                                                 |
|                               | #6 MeSH descriptor: [COVID-19] explode all trees                                                                                                                                                                                                                                                                                                                                                                                             |
|                               | #7 MeSH descriptor: [SARS-COV-2] explode all trees                                                                                                                                                                                                                                                                                                                                                                                           |

---

|  |     |                                                                                                                                                                                                                           |
|--|-----|---------------------------------------------------------------------------------------------------------------------------------------------------------------------------------------------------------------------------|
|  | #8  | "COVID-19" OR "COVID19" OR "SARS-CoV-2" OR "SARSCoV2" OR "SARS-Cov-19" OR "SARSCoV19" OR "2019-nCoV" OR "2019nCoV" OR "nCoV-2019" OR "nCoV2019" OR "coronavirus disease 2019" OR "novel coronavirus" OR "new coronavirus" |
|  | #9  | MeSH descriptor: [Controlled Clinical Trial] explode all trees                                                                                                                                                            |
|  | #10 | MeSH descriptor: [Randomized Controlled Trial] explode all trees                                                                                                                                                          |
|  | #11 | MeSH descriptor: [Random Allocation] explode all trees                                                                                                                                                                    |
|  | #12 | "RCT" OR "random*" OR "control*" OR "trial*"                                                                                                                                                                              |
|  | #13 | #1 OR #2                                                                                                                                                                                                                  |
|  | #14 | #3 OR #4 OR #5                                                                                                                                                                                                            |
|  | #15 | #6 OR #7 OR #8                                                                                                                                                                                                            |
|  | #16 | #9 OR #10 OR #11 OR #12                                                                                                                                                                                                   |
|  | #17 | #13 AND #14 AND #15 AND #16                                                                                                                                                                                               |

---

|                 |    |                                                                                                                                                                                                                                |
|-----------------|----|--------------------------------------------------------------------------------------------------------------------------------------------------------------------------------------------------------------------------------|
| <b>WHO</b>      | #1 | tw:("mindful" OR "mindfulness")                                                                                                                                                                                                |
| <b>COVID-19</b> | #2 | tw:("online" OR "on-line" OR "ehealth" OR "e-health" OR "virtual*" OR "web" OR "webs" OR "website" OR "websites" OR "internet" OR "app" OR "apps" OR "application" OR "applications" OR "mobile" OR "mhealth" OR "m-health")   |
| <b>Research</b> | #3 | tw:("COVID-19" OR "COVID19" OR "SARS-CoV-2" OR "SARSCoV2" OR "SARS-Cov-19" OR "SARSCoV19" OR "2019-nCoV" OR "2019nCoV" OR "nCoV-2019" OR "nCoV2019" OR "coronavirus disease 2019" OR "novel coronavirus" OR "new coronavirus") |
| <b>Database</b> | #4 | tw:("RCT" OR "random" OR "randomized" OR "randomised" OR "control" OR "controls" OR "controlled" OR "trial" OR "trials")                                                                                                       |
|                 | #5 | #1 AND #2 AND #3 AND #4                                                                                                                                                                                                        |

---

|                    |  |                                                                                    |
|--------------------|--|------------------------------------------------------------------------------------|
| <b>MedRxiv</b>     |  | ("mindfulness") AND ("online" OR "internet" OR "application") AND ("COVID-19") AND |
| <b>and BioRxiv</b> |  | ("randomized" OR "trial")                                                          |

---

**CENTRAL**, Cochrane Central Register of Controlled Trials; **CINAHL**, Cumulative Index to Nursing and Allied Health Literature; **COVID-19**, Coronavirus Disease 2019; **WHO**, World Health Organization.

**S2 Table. PICOS framework.**

| <b>Components of PICOS</b> | <b>Definition</b>                                        |
|----------------------------|----------------------------------------------------------|
| <b>Population</b>          | Adults aged 18 years and older                           |
| <b>Intervention</b>        | Online MBIs (including MBSR or MBCT)                     |
| <b>Comparison</b>          | Active or inactive control group                         |
| <b>Outcome</b>             | To reduce symptoms of depression, anxiety, or stress     |
| <b>Study Design</b>        | RCT conducted during the period of the COVID-19 pandemic |

**COVID-19**; Coronavirus Disease 2019; **MBI**, mindfulness-based intervention; **MBCT**, mindfulness-based cognitive therapy; **MBSR**; mindfulness-based stress reduction; **PICOS**, Population, Intervention, Comparison, Outcome, and Study Design; **RCT**, randomized controlled trial.

**S3 Table. Outcomes of included studies.**

| First Author,<br>Year                   | Depression<br>(Online MBIs) |      |           |      | Depression<br>(Control) |      |           |      | Anxiety<br>(Online MBIs) |      |           |      | Anxiety<br>(Control) |      |           |      | Stress<br>(Online MBIs) |       |           |      | Stress<br>(Control) |       |           |      |   |
|-----------------------------------------|-----------------------------|------|-----------|------|-------------------------|------|-----------|------|--------------------------|------|-----------|------|----------------------|------|-----------|------|-------------------------|-------|-----------|------|---------------------|-------|-----------|------|---|
|                                         | Post-Test                   |      | Follow-Up |      | Post-Test               |      | Follow-Up |      | Post-Test                |      | Follow-Up |      | Post-Test            |      | Follow-Up |      | Post-Test               |       | Follow-Up |      | Post-Test           |       | Follow-Up |      |   |
|                                         | M                           | SD   | M         | SD   | M                       | SD   | M         | SD   | M                        | SD   | M         | SD   | M                    | SD   | M         | SD   | M                       | SD    | M         | SD   | M                   | SD    | M         | SD   |   |
| <b>Alvarado-García et al., 2021 [1]</b> | -                           | -    | -         | -    | -                       | -    | -         | -    | -                        | -    | -         | -    | -                    | -    | -         | -    | -                       | 37.83 | 6.07      | -    | -                   | 50.58 | 8.12      | -    | - |
| <b>Hosseinzadeh Asl, 2021 [2]</b>       | 9.5                         | 8.03 | 11.21     | 8.01 | 12.1                    | 8.89 | 13.14     | 8.04 | 4.79                     | 4.05 | 5.5       | 3.34 | 6                    | 4.35 | 6.67      | 4.31 | 9.93                    | 6.7   | 10.86     | 6.15 | 12.48               | 7.59  | 13.24     | 7.2  |   |
| <b>Huang et al., 2021 [3]</b>           | -                           | -    | -         | -    | -                       | -    | -         | -    | -                        | -    | -         | -    | -                    | -    | -         | -    | -                       | 50.25 | 30.12     | -    | -                   | 59.17 | 11.24     | -    | - |
| <b>Kam et al., 2021 [4]</b>             | 15.84                       | 7.04 | -         | -    | 16.57                   | 6.89 | -         | -    | 17.84                    | 7.66 | -         | -    | 19.07                | 8.33 | -         | -    | -                       | -     | -         | -    | -                   | -     | -         | -    | - |
| <b>Peh et al., 2020 [5]</b>             | -                           | -    | -         | -    | -                       | -    | -         | -    | 12.59                    | 4.94 | 13.91     | 5.53 | 12.92                | 4.8  | 13.31     | 5.59 | 4.02                    | 1.58  | 4.52      | 2.11 | 4.22                | 1.86  | 3.86      | 1.98 |   |
| <b>Simonsson et al., 2021 [6]</b>       | 8.81                        | 3.75 | 8.94      | 3.83 | 10.23                   | 4.06 | 9.56      | 4.12 | 9.81                     | 3.54 | 9.57      | 3.76 | 11.7                 | 3.72 | 10.87     | 3.45 | -                       | -     | -         | -    | -                   | -     | -         | -    |   |
| <b>Smith et al., 2021 [7]</b>           | 4                           | 2.9  | -         | -    | 5.4                     | 3.4  | -         | -    | 5                        | 3.9  | -         | -    | 6.9                  | 4.7  | -         | -    | 12.7                    | 5.6   | -         | -    | 17                  | 6.7   | -         | -    |   |
| <b>Sun et al., 2021 [8]</b>             | 6.42                        | 3.76 | 5.98      | 3.64 | 7.63                    | 5.24 | 7.77      | 4.91 | 6.08                     | 3.99 | 5.54      | 3.48 | 6.13                 | 4.26 | 7.04      | 4.75 | -                       | -     | -         | -    | -                   | -     | -         | -    |   |

M, mean; MBI, mindfulness-based intervention; SD, standard deviation.

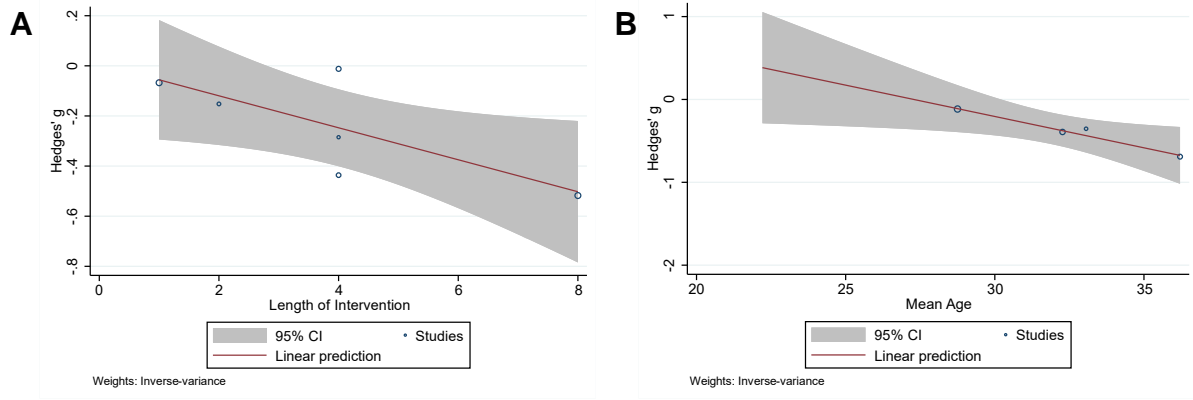

**S1 Fig. Bubble plots of meta-regression analyses of online MBIs effect on mental health outcomes at post-intervention. (A) Length of intervention on anxiety. (B) Mean age on stress.**

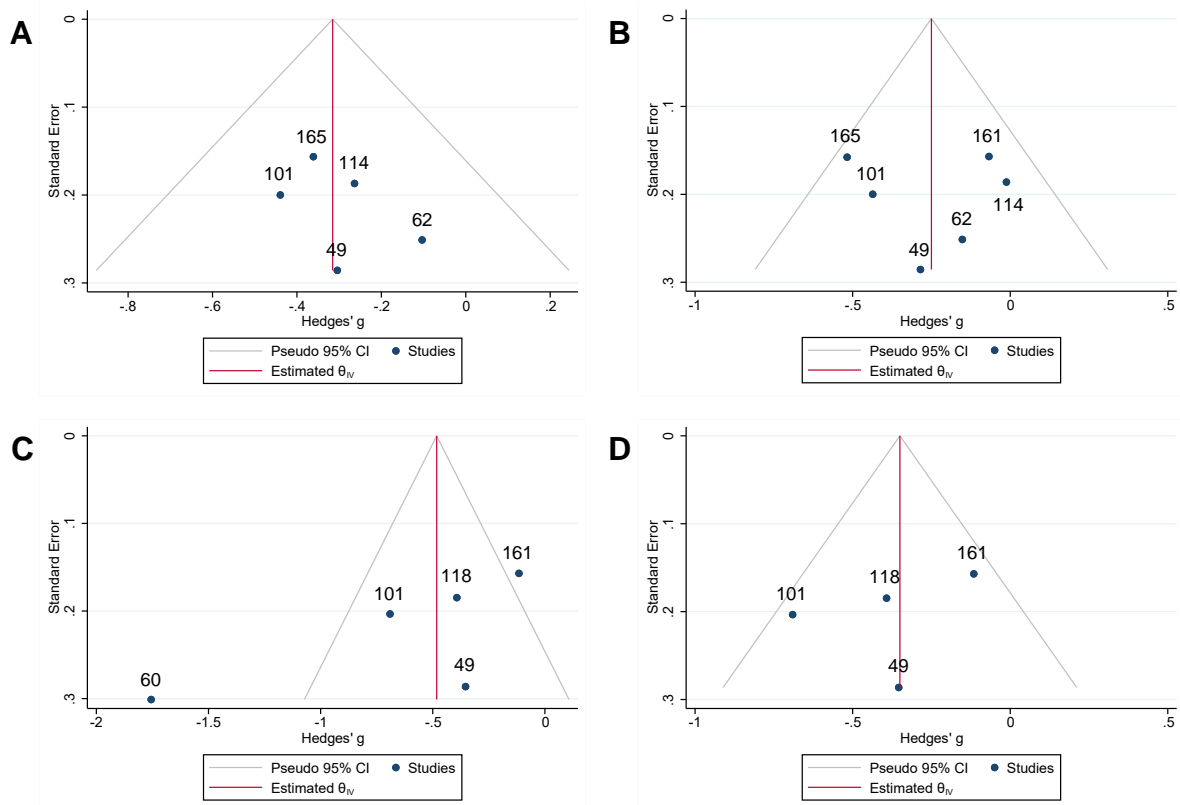

**S2 Fig. Funnel plots of meta-analyses of online MBIs effect on mental health outcomes at post-intervention. (A) Depression. (B) Anxiety. (C) Stress (including outliers). (D) Stress (excluding outliers).** The number above or below each dot indicates the sample size of the corresponding study in the analysis.



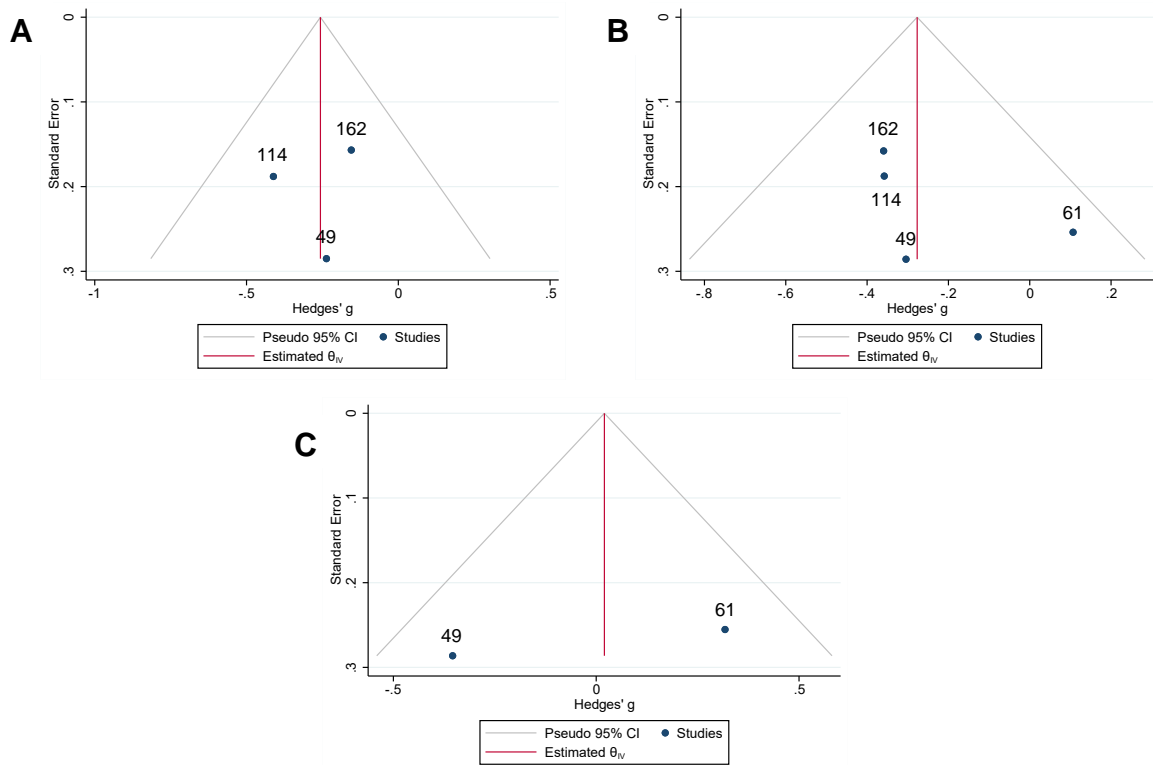

**S3 Fig. Funnel plots of meta-analyses of online MBIs effect on mental health outcomes at follow-up. (A) Depression. (B) Anxiety. (C) Stress.** The number above or below each dot indicates the sample size of the corresponding study included in the analysis.

## REFERENCES

1. Alvarado-García PAA, Soto-Vásquez MR. Effect of an online mindfulness program on stress during the covid-19 pandemic. *Med Natur.* 2021;15: 46–49.
2. Hosseinzadeh Asl NR. A randomized controlled trial of a mindfulness-based intervention in social workers working during the COVID-19 crisis. *Curr Psychol.* 2021; 1–8. doi:10.1007/s12144-021-02150-3
3. Huang X, Li J, Yu H, Huang L, Huang X, Wang X. Comparison of Psychological Intervention Effects of Mindfulness-Based Stress Reduction and Mental Health Education on Medical Staff in COVID-19 Isolation Ward. *J Chengdu Med Coll.* 2021;16: 197–202. doi:10.3939/j.issn.1674-2257.2021.02.016
4. Kam JWY, Javed J, Hart CM, Andrews-Hanna JR, Tomfohr-Madsen LM, Mills C. Daily mindfulness training reduces negative impact of COVID-19 news exposure on affective well-being. *Psychol Res.* 2021; 1–12. doi:10.1007/s00426-021-01550-1
5. Peh K-S, Tan H-C, Tan C-S. Effects of an Ultra-brief Online Mindfulness-based Intervention on Mental Health during the Coronavirus Disease (COVID-19) Outbreak in Malaysia: A Randomized Controlled Trial. *Makara Hum Behav Stud Asia.* 2020;24: 118. doi:10.7454/hubs.asia.2140920
6. Simonsson O, Bazin O, Fisher SD, Goldberg SB. Effects of an eight-week, online mindfulness program on anxiety and depression in university students during COVID-19: A randomized controlled trial. *Psychiatry Res.* 2021;305: 114222. doi:10.1016/j.psychres.2021.114222
7. Smith RB, Mahnert ND, Foote J, Saunders KT, Mourad J, Huberty J. Mindfulness Effects in Obstetric and Gynecology Patients During the Coronavirus Disease 2019 (COVID-19) Pandemic: A Randomized Controlled Trial. *Obstet Gynecol.* 2021;137: 1032–1040. doi:10.1097/AOG.0000000000004316
8. Sun S, Lin D, Goldberg S, Shen Z, Chen P, Qiao S, et al. A mindfulness-based mobile health (mHealth) intervention among psychologically distressed university students in quarantine during the COVID-19 pandemic: A randomized controlled trial. *J Couns Psychol.* 2021. doi:10.1037/cou0000568
